# Supplementary material for: Fully automated treatment planning of spinal metastases – A comparison to manual planning of Volumetric Modulated Arc Therapy for conventionally fractionated irradiation
Source: Radiat Oncol. 2017 Jan 31;12:33. doi: 10.1186/s13014-017-0767-2 (PMC5282882; doi:10.1186/s13014-017-0767-2)
Supplement: Additional file 1: — ﻿Detailed comparison of auto- and manual planning results.﻿ (PDF 274 kb) [file 13014_2017_767_MOESM1_ESM.pdf]

| Plan Number | Patient number | Analyzed OAR      | PTV location   | Primary            | PTV       |           |          |          |           |           |          |       |                     |      | R. Kidney |            | L. Kidney  |            | R. Lung    |            | L. Lung    |            | Monitor Units (MU) |      | Treatment time |         | Spinal cord |           |           |      |
|-------------|----------------|-------------------|----------------|--------------------|-----------|-----------|----------|----------|-----------|-----------|----------|-------|---------------------|------|-----------|------------|------------|------------|------------|------------|------------|------------|--------------------|------|----------------|---------|-------------|-----------|-----------|------|
|             |                |                   |                |                    | Clinical  |           | autoVMAT |          | Clinical  |           | autoVMAT |       | Clinical            |      | autoVMAT  |            | Clinical   |            | autoVMAT   |            | Clinical   |            | autoVMAT           |      | Clinical       |         | autoVMAT    |           |           |      |
|             |                |                   |                |                    | D58% (Gy) | D58% (Gy) | D2% (Gy) | D2% (Gy) | D50% (Gy) | D50% (Gy) | HI       | HI    | V28.5Gy or V38Gy(%) | CI   | CI        | Dmean (Gy)         | # MU | # MU           | t (sec) | t (sec)     | Dmax (Gy) | Dmax (Gy) |      |
| 1           | 1              | Kidneys           | T11-L5         | Prostate           | 27.2      | 26.5      | 31.3     | 31.3     | 30.0      | 30.0      | 0.137    | 0.158 | 90.8                | 89.8 | 0.9894    | 0.9797     | 5.1        | 4.1        | 5.2        | 3.1        |            |            | 525                | 581  | 77             | 85      | 31.9        | 31.7      |           |      |
| 2           | 2              | Kidneys           | T12-L5         | Prostate           | 27.6      | 26.9      | 31.0     | 31.0     | 30.0      | 30.0      | 0.132    | 0.155 | 94.7                | 95.0 | 1.0213    | 1.0381     | 5.0        | 4.6        | 5.0        | 3.7        |            |            | 708                | 791  | 194            | 193     | 31.7        | 31.9      |           |      |
| 3           | 3              | Kidneys           | T11-L2         | Breast             | 27.0      | 27.8      | 31.1     | 31.0     | 30.0      | 30.0      | 0.139    | 0.105 | 90.3                | 94.9 | 0.9338    | 1.0149     | 5.1        | 3.3        | 4.9        | 4.4        |            |            | 734                | 805  | 163            | 176     | 31.5        | 31.4      |           |      |
| 5           | 4              | Kidneys           | T10-L6         | Multiple Myeloma   | 36.4      | 35.9      | 41.7     | 41.3     | 40.0      | 40.0      | 0.133    | 0.136 | 89.6                | 90.1 | 0.9515    | 1.0348     | 8.0        | 7.1        | 7.8        | 5.1        |            |            | 473                | 517  | 156            | 173     | 43.3        | 42.0      |           |      |
| 6           | 5              | Kidneys           | T10-S3         | Breast             | 35.9      | 35.1      | 41.5     | 41.2     | 40.0      | 40.0      | 0.138    | 0.155 | 90.9                | 92.9 | 0.9503    | 1.0080     | 6.9        | 5.4        | 6.8        | 4.5        |            |            | 424                | 446  | 141            | 151     | 41.8        | 41.9      |           |      |
| 7           | 6              | Kidneys           | L2-L5          | Breast             | 36.8      | 35.7      | 41.4     | 41.3     | 40.0      | 40.0      | 0.115    | 0.141 | 94.4                | 92.6 | 0.9596    | 0.9703     | 8.2        | 7.9        | 7.6        | 5.1        |            |            | 394                | 474  | 152            | 172     | 42.2        | 42.4      |           |      |
| 9           | 7              | Kidneys           | L3-S5          | Prostate           | 27.5      | 24.8      | 31.0     | 30.9     | 30.0      | 30.0      | 0.135    | 0.206 | 93.4                | 93.4 | 0.9840    | 1.0166     | 5.3        | 3.7        | 5.5        | 2.8        |            |            | 581                | 599  | 186            | 239     | 28.9        | 30.7      |           |      |
| 11          | 9              | Kidneys           | T11-L1         | Prostate           | 28.1      | 28.5      | 30.9     | 30.9     | 30.0      | 30.0      | 0.095    | 0.078 | 95.6                | 88.2 | 1.0428    | 1.0979     | 4.8        | 4.0        | 4.1        | 2.5        |            |            | 639                | 753  | 164            | 170     | 31.4        | 31.1      |           |      |
| 12          | 10             | Kidneys           | T12-L2         | Breast             | 27.3      | 28.5      | 31.3     | 30.9     | 30.0      | 30.0      | 0.132    | 0.079 | 91.1                | 98.0 | 0.9684    | 1.1071     | 4.2        | 3.5        | 4.3        | 4.1        |            |            | 565                | 668  | 163            | 168     | 32.0        | 31.7      |           |      |
| 14          | 11             | Kidneys           | T11-L2         | NSCLC              | 28.1      | 27.9      | 31.2     | 31.0     | 30.0      | 30.0      | 0.104    | 0.104 | 95.4                | 95.2 | 1.0454    | 1.0402     | 6.0        | 4.3        | 5.8        | 3.8        |            |            | 615                | 753  | 178            | 178     | 31.5        | 31.4      |           |      |
| 15          | 12             | Kidneys           | T10-L4         | Multiple Myeloma   | 27.2      | 28.4      | 31.1     | 30.8     | 30.0      | 30.0      | 0.132    | 0.082 | 90.3                | 97.5 | 0.9234    | 1.0258     | 4.6        | 4.0        | 4.7        | 3.4        |            |            | 585                | 788  | 126            | 134     | 31.5        | 32.0      |           |      |
| 16          | 13             | Kidneys           | T12-L2         | Breast             | 27.8      | 26.3      | 31.0     | 31.2     | 30.0      | 30.0      | 0.108    | 0.163 | 94.5                | 91.7 | 1.0277    | 0.9904     | 8.4        | 5.9        | 7.2        | 3.5        |            |            | 547                | 720  | 165            | 171     | 31.4        | 31.2      |           |      |
| 17          | 14             | Kidneys           | T12-L5         | Desophgeal         | 27.0      | 27.3      | 31.5     | 30.9     | 30.0      | 30.0      | 0.150    | 0.119 | 93.3                | 95.5 | 1.0055    | 1.0532     | 5.7        | 7.6        | 5.2        | 4.5        |            |            | 776                | 861  | 180            | 202     | 32          | 31.4      |           |      |
| 19          | 15             | Kidneys           | T12-L5         | Prostate           | 35.3      | 29.8      | 41.9     | 41.4     | 40.0      | 40.0      | 0.105    | 0.291 | 89.1                | 87.6 | 0.9171    | 0.9552     | 8.1        | 5.1        | 8.1        | 5.2        |            |            | 498                | 557  | 163            | 183     | 41.9        | 43.7      |           |      |
| 21          | 16             | Kidneys           | T12-L3         | H & N SCC          | 26.6      | 26.2      | 31.2     | 30.9     | 30.0      | 30.0      | 0.154    | 0.157 | 89.7                | 94.4 | 0.9828    | 1.0792     | 6.2        | 5.9        | 6.1        | 5.7        |            |            | 702                | 783  | 171            | 179     | 31.3        | 31.1      |           |      |
| 22          | 17             | Kidneys           | L1             | Breast             | 36.4      | 36.6      | 41.3     | 41.5     | 40.0      | 40.0      | 0.123    | 0.123 | 91.3                | 93.2 | 0.9743    | 1.0048     | 4.3        | 4.0        | 4.9        | 5.3        |            |            | 363                | 435  | 123            | 122     | 42.1        | 42.3      |           |      |
| 23          | 18             | Kidneys           | T12-S5         | Prostate           | 26.5      | 22.0      | 31.2     | 31.1     | 30.0      | 30.0      | 0.156    | 0.302 | 90.8                | 87.5 | 0.9488    | 0.9306     | 5.3        | 4.0        | 5.1        | 3.4        |            |            | 742                | 805  | 240            | 259     | 31.6        | 31.4      |           |      |
| 26          | 20             | Kidneys           | T8-S5 / pelvis | Breast             | 36.6      | 32.0      | 41.8     | 41.2     | 40.0      | 40.0      | 0.129    | 0.231 | 93.4                | 89.9 | 1.0294    | 1.0073     | 9.6        | 6.5        | 6.7        | 5.7        |            |            | 652                | 702  | 267            | 312     | 42.5        | 41.7      |           |      |
| 28          | 21             | Kidneys           | T9-L1          | Adenocarcinoma CUP | 27.5      | 27.7      | 31.0     | 30.9     | 30.0      | 30.0      | 0.116    | 0.108 | 95.1                | 95.3 | 1.0426    | 1.0268     | 3.8        | 3.6        | 3.9        | 4.2        |            |            | 778                | 842  | 137            | 212     | 31.2        | 31.2      |           |      |
| 30          | 23             | Kidneys           | T12-L1         | Breast             | 26.9      | 27.8      | 31.0     | 31.0     | 30.0      | 30.0      | 0.135    | 0.108 | 86.7                | 94.3 | 0.8799    | 0.9706     | 4.9        | 3.8        | 5.1        | 3.1        |            |            | 584                | 808  | 124            | 132     | 31.1        | 31        |           |      |
| 31          | 24             | Kidneys           | T8-L3          | SCLC               | 27.2      | 25.5      | 31.0     | 31.3     | 30.0      | 30.0      | 0.129    | 0.194 | 92.7                | 89.5 | 1.0012    | 0.9497     | 5.5        | 4.6        | 5.3        | 4.0        |            |            | 787                | 905  | 133            | 147     | 31.5        | 33.2      |           |      |
| 33          | 25             | Kidneys           | L3             | Gastric Cancer     | 28.8      | 29.2      | 30.8     | 30.8     | 30.0      | 30.0      | 0.065    | 0.053 | 99.0                | 99.9 | 1.2480    | 1.2620     | 1.2        | 1.0        | 1.0        | 0.9        |            |            | 452                | 614  | 156            | 160     | 31.2        | 31.1      |           |      |
| 10          | 8              | Kidneys and Lungs | T10-L3         | Urothelial         | 35.7      | 36.9      | 41.9     | 41.4     | 40.0      | 40.0      | 0.153    | 0.111 | 85.8                | 92.9 | 0.8796    | 0.9771     | 7.5        | 5.9        | 7.1        | 8.4        | 3.2        | 3.4        | 2.4                | 2.7  | 475            | 519     | 181         | 42.4      | 42.2      |      |
| 25          | 19             | Kidney and Lung   | T11-L1         | NSCLC              | 27.8      | 27.5      | 31.0     | 30.9     | 30.0      | 30.0      | 0.106    | 0.113 | 94.7                | 94.9 | 1.0256    | 1.0047     | 2.8        | 1.9        | 4.0        | 3.6        | 0.8        | 0.8        | 2.2                | 1.8  | 537            | 711     | 168         | 165       | 31.7      | 31   |
| 29          | 22             | Kidneys and Lungs | T7-L1          | Breast             | 27.0      | 26.6      | 31.9     | 31.0     | 30.0      | 30.0      | 0.164    | 0.146 | 93.5                | 94.8 | 0.9896    | 1.0346     | 4.8        | 4.3        | 4.8        | 4.2        | 5.0        | 4.9        | 4.2                | 3.9  | 1113           | 1185    | 170         | 184       | 30.7      | 31.5 |
| 34          | 25             | Lungs             | T9-T11         | Gastric            | 27.6      | 27.2      | 30.9     | 31.0     | 30.0      | 30.0      | 0.110    | 0.128 | 93.7                | 94.1 | 1.0268    | 1.0318     |            |            |            |            | 3.3        | 2.7        | 2.8                | 2.4  | 472            | 628     | 162         | 158       | 31        | 31.5 |
| 35          | 25             | Lungs             | T3-T6          | Gastric            | 27.2      | 27.9      | 31.1     | 30.9     | 30.0      | 30.0      | 0.130    | 0.100 | 90.9                | 95.6 | 0.9823    | 1.0620     |            |            |            |            | 3.3        | 3.7        | 3.7                | 4.3  | 549            | 693     | 159         | 181       | 31.7      | 30.9 |
| 36          | 26             | Lungs             | T5-T10         | Breast             | 27.8      | 28.1      | 31.1     | 30.9     | 30.0      | 30.0      | 0.110    | 0.094 | 93.5                | 95.9 | 1.0047    | 1.0524     |            |            |            |            | 6.6        | 6.9        | 6.2                | 5.5  | 442            | 462     | 87          | 93        | 31.6      | 31.6 |
| 37          | 27             | Lungs             | T3-T6          | Prostate           | 27.8      | 27.9      | 30.9     | 31.1     | 30.0      | 30.0      | 0.102    | 0.107 | 94.4                | 95.8 | 1.0050    | 1.0461     |            |            |            |            | 4.4        | 3.6        | 4.6                | 3.7  | 434            | 417     | 84          | 101       | 31.6      | 31.5 |
| 38          | 28             | Lungs             | T6-T11         | Prostate           | 27.9      | 27.8      | 31.2     | 31.0     | 30.0      | 30.0      | 0.107    | 0.107 | 94.5                | 93.8 | 1.0262    | 0.9875     |            |            |            |            | 5.5        | 5.6        | 5.2                | 3.5  | 443            | 551     | 81          | 104       | 31.8      | 31.0 |
| 39          | 29             | Lungs             | T7-T9          | Prostate           | 28.1      | 27.9      | 31.1     | 31.0     | 30.0      | 30.0      | 0.100    | 0.104 | 90.0                | 95.0 | 1.0502    | 1.0347     |            |            |            |            | 4.0        | 3.2        | 3.7                | 2.5  | 530            | 617     | 162         | 150       | 31.2      | 31.0 |
| 40          | 30             | Lungs             | T3-T8          | NSCLC (Adeno)      | 22.6      | 25.6      | 32.4     | 31.0     | 30.0      | 30.0      | 0.325    | 0.180 | 78.8                | 89.8 | 0.8074    | 0.9525     |            |            |            |            | 4.3        | 5.9        | 4.6                | 6.2  | 648            | 621     | 155         | 179       | 32.8      | 31.3 |
| 41          | 31             | Lungs             | C6-T4          | Breast             | 28.4      | 28.3      | 30.9     | 30.8     | 30.0      | 30.0      | 0.082    | 0.083 | 97.7                | 97.4 | 1.1740    | 1.1120     |            |            |            |            | 2.4        | 1.8        | 2.5                | 1.9  | 652            | 722     | 193         | 209       | 31.1      | 31.1 |
| 42          | 32             | Lungs             | T2-T4          | Multiple Myeloma   | 27.7      | 27.3      | 31.1     | 31.0     | 30.0      | 30.0      | 0.111    | 0.121 | 91.2                | 91.3 | 0.9727    | 0.9819     |            |            |            |            | 3.0        | 2.4        | 2.7                | 2.0  | 490            | 810     | 122         | 137       | 31.8      | 31.4 |
| 4           | 3              | Lungs             | T6-T8          | Breast             | 28.3      | 28.7      | 30.9     | 30.8     | 30.0      | 30.0      | 0.088    | 0.073 | 97.0                | 86.6 | 1.0576    | 1.0550     |            |            |            |            | 4.5        | 4.3        | 3.9                | 2.9  | 595            | 640     | 169         | 164       | 31.4      | 31.3 |
| 8           | 6              | Lungs             | T6-T11         | Breast             | 37.0      | 37.0      | 41.4     | 41.1     | 40.0      | 40.0      | 0.132    | 0.101 | 94.4                | 95.4 | 1.0027    | 1.0291     |            |            |            |            | 7.6        | 8.6        | 6.9                | 5.8  | 354            | 432     | 159         | 172       | 41.8      | 42.7 |
| 13          | 10             | Lungs             | C7-T5          | Breast             | 27.9      | 28.0      | 31.0     | 30.9     | 30.0      | 30.0      | 0.101    | 0.095 | 94.9                | 96.3 | 1.0009    | 1.0787     |            |            |            |            | 4.7        | 4.5        | 4.8                | 4.1  | 457            | 610     | 161         | 165       | 31.1      | 31.3 |
| 18          | 14             | Lungs             | T7-T10         | Desophgeal         | 28.0      | 28.4      | 31.1     | 30.9     | 30.0      | 30.0      | 0.103    | 0.084 | 95.3                | 97.5 | 1.0122    | 1.0498     |            |            |            |            | 4.6        | 4.6        | 4.9                | 3.0  | 463            | 691     | 202         | 160       | 31        | 31.1 |
| 20          | 15             | Lungs             | T3-T8          | Prostate           | 35.8      | 36.4      | 41.4     | 41.4     | 40.0      | 40.0      | 0.140    | 0.124 | 91.4                | 93.1 | 1.0200    | 1.0526     |            |            |            |            | 6.8        | 7.5        | 6.4                | 5.4  | 373            | 448     | 163         | 148       | 41.5      | 41.6 |
| 24          | 18             | Lungs             | T2-T9          | Prostate           | 26.4      | 27.3      | 31.3     | 31.0     | 30.0      | 30.0      | 0.164    | 0.126 | 90.3                | 94.1 | 0.9483    | 1.0087     |            |            |            |            | 9.3        | 11.8       | 5.9                | 6.1  | 1115           | 1009    | 269         | 285       | 32.1      | 31.7 |
| 27          | 20             | Lungs             | T3             | Breast             | 27.7      | 27.1      | 30.9     | 31.1     | 30.0      | 30.0      | 0.106    | 0.132 | 93.3                | 92.4 | 1.0955    | 1.0665     |            |            |            |            | 2.1        | 1.6        | 2.4                | 1.8  | 452            | 689     | 153         | 159       | 31.4      | 30.9 |
| 32          | 24             | Lungs             | T4-T5          | SCLC               | 27.9      | 27.6      | 30.9     | 31.0     | 30.0      | 30.0      | 0.100    | 0.112 | 94.3                | 94.0 | 1.0253    | 1.0379     |            |            |            |            | 4.0        | 3.0        | 4.2                | 3.2  | 572            | 806     | 172         | 168       | 31.2      | 31.3 |
